# Supplementary material for: Realizing long-term cycling stability of O3-type layered oxide cathodes for sodium-ion batteries
Source: Royal Society of Chemistry journal article supplement (doi:10.1039/d4mh00333k), 2024-01-01
Supplement: d4mh00333k1.pdf [file d4mh00333k1.pdf]

## Supporting Information

### Realizing Long-Term Cycling Stability of O3-Type Layered Oxide Cathode for Sodium-Ion Batteries

*Guohua Zhang,<sup>1</sup> Yuheng Gao,<sup>2</sup> Ping Zhang,<sup>1</sup> Yuheng Gao,<sup>1</sup> Jingrong Hou,<sup>1</sup> Xuemin Shi,<sup>1</sup> Jiwei Ma,<sup>1</sup> Renyuan Zhang,<sup>1\*</sup> and Yunhui Huang<sup>2\*</sup>*

<sup>1</sup>Institute of New Energy for Vehicles, Shanghai Key Laboratory for R&D and Application of Metallic Functional Materials, School of Materials Science and Engineering, Tongji University, Shanghai 201804, China

*E-mail: ryzhang@tongji.edu.cn;*

<sup>2</sup>State Key Laboratory of Material Processing and Die & Mould Technology, School of Materials Science and Engineering, Huazhong University of Science and Technology, Wuhan, Hubei 430074, China

*E-mail: huangyh@hust.edu.cn*

\* Corresponding author

**Table S1.** Structural information of NFM, SNFM, LNFM and LSNFM obtained from Rietveld refinements.

**NFM**

| <b>Atom</b> | <b>Site</b> | <b>x</b> | <b>y</b> | <b>z</b> | <b>Occ.</b> |
|-------------|-------------|----------|----------|----------|-------------|
| <b>O</b>    | 6c          | 0        | 0        | 0.2348   | 1           |
| <b>Fe</b>   | 3b          | 0        | 0        | 0.5      | 0.28        |
| <b>Mn</b>   | 3b          | 0        | 0        | 0.5      | 0.5         |
| <b>Ni</b>   | 3b          | 0        | 0        | 0.5      | 0.22        |
| <b>Na</b>   | 3a          | 0        | 0        | 0        | 0.95        |

Space group  $R\bar{3}m$ .  $a = b = 2.94863(1)$  Å,  $c = 16.32531(7)$  Å,  $V = 122.923$  Å<sup>3</sup>.  $R_p = 2.51\%$ ,  $R_{wp} = 3.32\%$ ,  $R_{exp} = 2.56\%$ ,  $\chi^2 = 1.67$ .

**SNFM**

| <b>Atom</b> | <b>Site</b> | <b>x</b> | <b>y</b> | <b>z</b> | <b>Occ.</b> |
|-------------|-------------|----------|----------|----------|-------------|
| <b>O</b>    | 6c          | 0        | 0        | 0.2348   | 1           |
| <b>Fe</b>   | 3b          | 0        | 0        | 0.5      | 0.27        |
| <b>Mn</b>   | 3b          | 0        | 0        | 0.5      | 0.5         |
| <b>Ni</b>   | 3b          | 0        | 0        | 0.5      | 0.22        |
| <b>Na</b>   | 3a          | 0        | 0        | 0        | 0.95        |
| <b>Sn</b>   | 3b          | 0        | 0        | 0.5      | 0.01        |

Space group  $R\bar{3}m$ .  $a = b = 2.95216(8)$  Å,  $c = 16.35792(2)$  Å,  $V = 123.464$  Å<sup>3</sup>.  $R_p = 2.83\%$ ,  $R_{wp} = 3.79\%$ ,  $R_{exp} = 2.85\%$ ,  $\chi^2 = 1.77$ .

**LNFM**

| <b>Atom</b> | <b>Site</b> | <b>x</b> | <b>y</b> | <b>z</b> | <b>Occ.</b> |
|-------------|-------------|----------|----------|----------|-------------|
| <b>O</b>    | 6c          | 0        | 0        | 0.2348   | 1           |
| <b>Fe</b>   | 3b          | 0        | 0        | 0.5      | 0.21        |
| <b>Mn</b>   | 3b          | 0        | 0        | 0.5      | 0.5         |
| <b>Ni</b>   | 3b          | 0        | 0        | 0.5      | 0.22        |
| <b>Na</b>   | 3a          | 0        | 0        | 0        | 0.95        |
| <b>Li</b>   | 3b          | 0        | 0        | 0.5      | 0.07        |

Space group  $R\bar{3}m$ .  $a = b = 2.94553(5)$  Å,  $c = 16.20275(1)$  Å,  $V = 121.744$  Å<sup>3</sup>.  $R_p = 2.62\%$ ,  $R_{wp} = 3.53\%$ ,  $R_{exp} = 2.61\%$ ,  $\chi^2 = 1.83$ .

**LSNFM**

| <b>Atom</b> | <b>Site</b> | <b>x</b> | <b>y</b> | <b>z</b> | <b>Occ.</b> |
|-------------|-------------|----------|----------|----------|-------------|
| <b>O</b>    | 6c          | 0        | 0        | 0.2348   | 1           |
| <b>Fe</b>   | 3b          | 0        | 0        | 0.5      | 0.2         |
| <b>Mn</b>   | 3b          | 0        | 0        | 0.5      | 0.5         |
| <b>Ni</b>   | 3b          | 0        | 0        | 0.5      | 0.22        |
| <b>Na</b>   | 3a          | 0        | 0        | 0        | 0.95        |
| <b>Li</b>   | 3b          | 0        | 0        | 0.5      | 0.07        |
| <b>Sn</b>   | 3b          | 0        | 0        | 0.5      | 0.01        |

Space group  $R\bar{3}m$ .  $a = b = 2.95058(6)$  Å,  $c = 16.21883(2)$  Å,  $V = 122.283$  Å<sup>3</sup>.  $R_p = 2.69\%$ ,  $R_{wp} = 3.60\%$ ,  $R_{exp} = 2.65\%$ ,  $\chi^2 = 1.85$ .

Table S2. Comparisons of the lattice parameters among NFM, SNFM, LNFM and LSNFM samples.

| Samples | $a=b$ (Å) | $c$ (Å) | $V$ (Å <sup>3</sup> ) |
|---------|-----------|---------|-----------------------|
| NFM     | 2.9486    | 16.3253 | 122.923               |
| SNFM    | 2.9522    | 16.3579 | 123.464               |
| LNFM    | 2.9455    | 16.2028 | 121.744               |
| LSNFM   | 2.9506    | 16.2188 | 122.283               |

Table S3. The lengths of Mn–O bonds and distances of Na<sup>+</sup> layers from Rietveld refinement results for as-prepared samples.

| Samples                 | NFM    | SNFM   | LNFM   | LSNFM  |
|-------------------------|--------|--------|--------|--------|
| $d_{\text{Mn-O}}$ (Å)   | 2.0336 | 2.0365 | 2.0275 | 2.0305 |
| $d_{\text{O-Na-O}}$ (Å) | 3.2172 | 3.2236 | 3.1930 | 3.1962 |

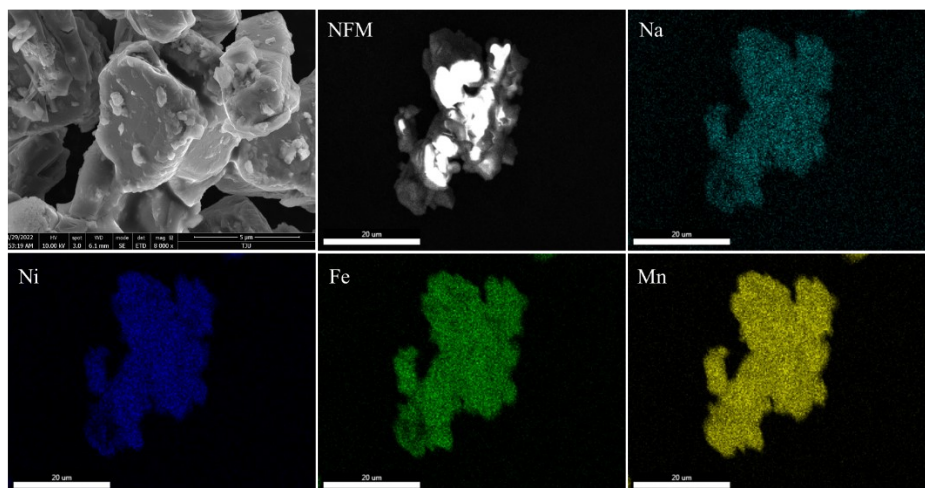

**Figure S1.** SEM-EDS mapping images of NFM

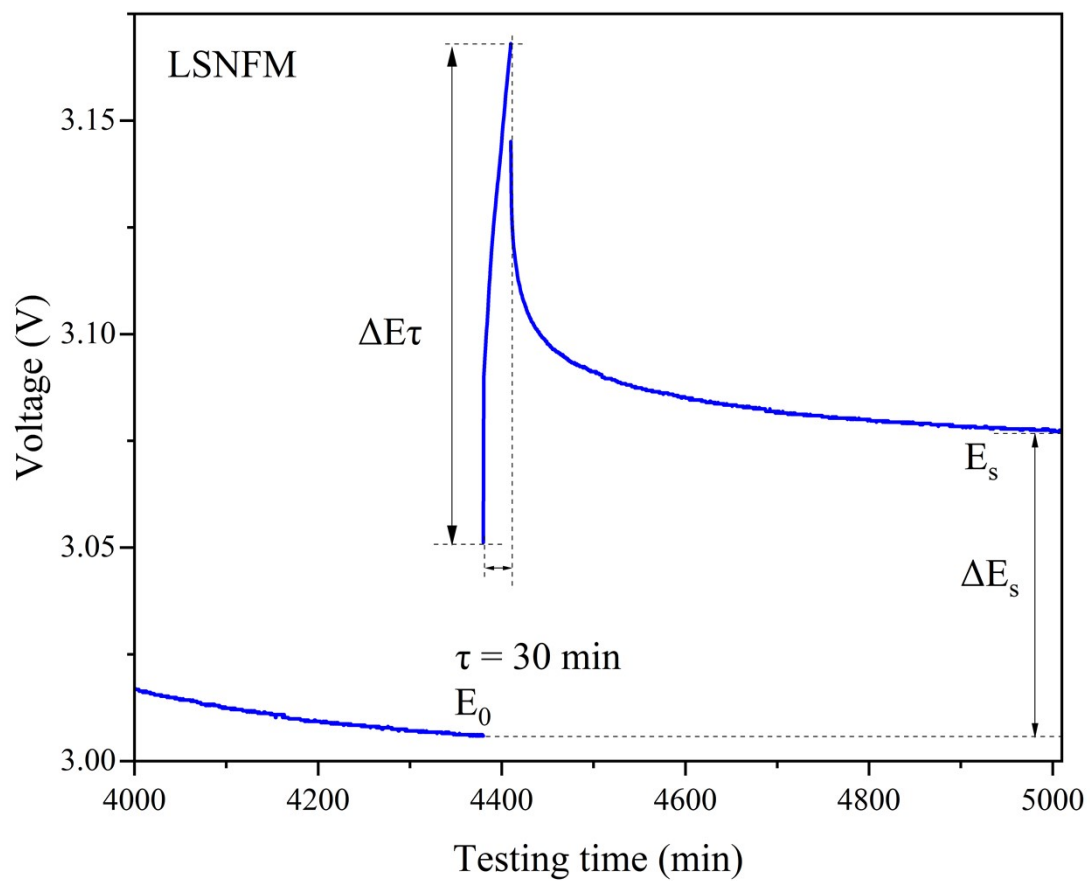

**Figure S2.** Voltage vs time profiles for a single titration of a GITT experiment of LSNFM.

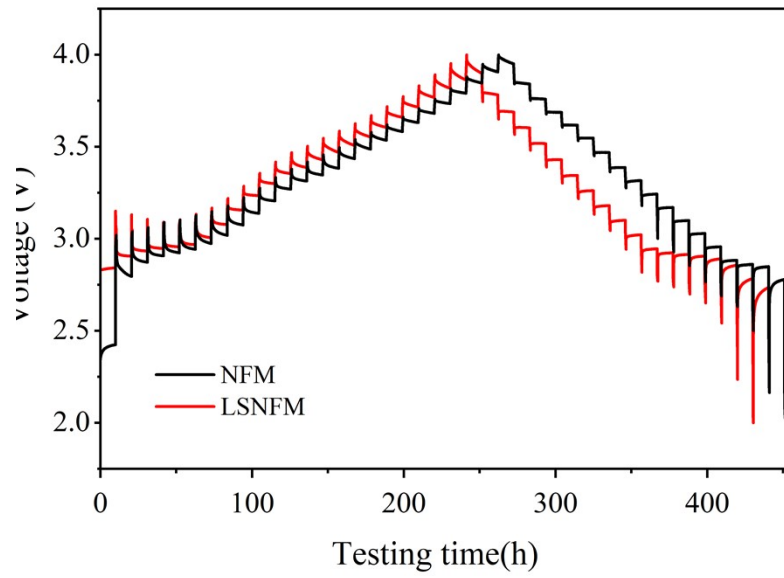

**Figure S3.** Charge–discharge GITT profiles in the first cycle at 0.1 C.



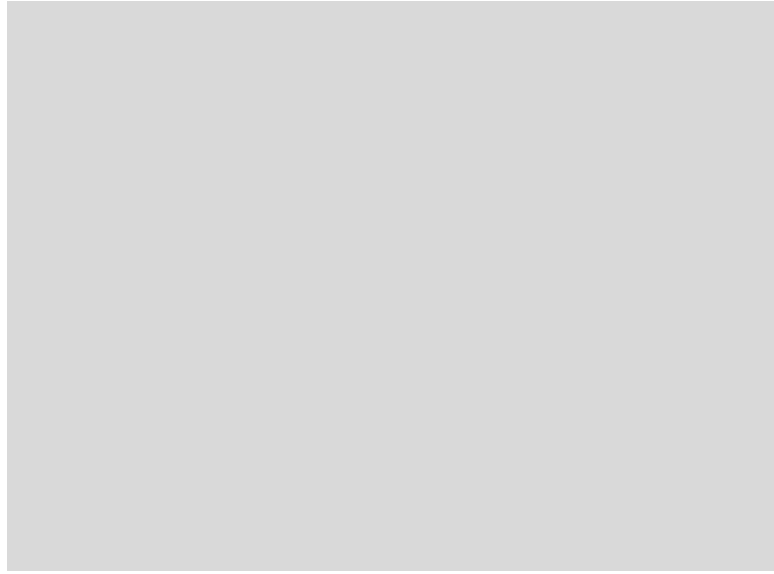

**Figure S4.** The calculated  $\text{Na}^+$  diffusion coefficients ( $D_{\text{Na}^+}$ ) from GITT tests.

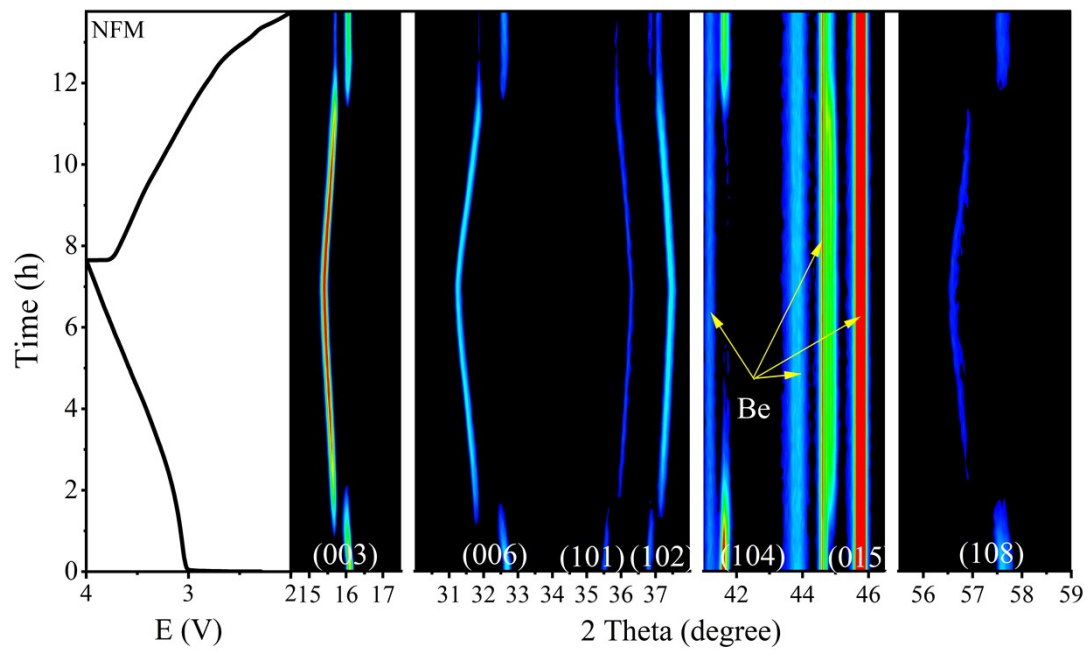

**Figure S5.** Contour plots of *in-situ* XRD for the NFM material during the first charge/discharge process at 0.1 C in the voltage range of 2.0–4.0 V.

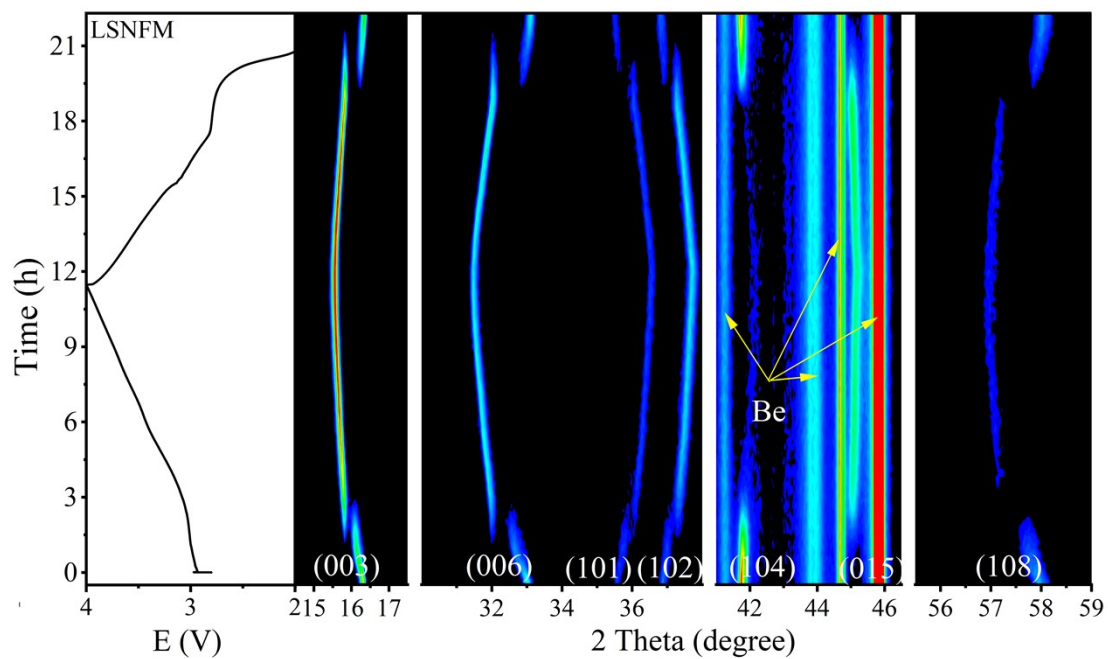

**Figure S6.** Contour plots of *in-situ* XRD for the LSNFM material during the first charge/discharge process at 0.1 C in the voltage range of 2.0–4.0 V.

**Table S4.** Cycling performance of the representative and important layered oxide cathode materials

| Cathode material                                                                                                                                                                                  | Voltage range          | Initial capacity          | Cycle retention ratio                                         | Synthesis       | Ref. |
|---------------------------------------------------------------------------------------------------------------------------------------------------------------------------------------------------|------------------------|---------------------------|---------------------------------------------------------------|-----------------|------|
| O3-NaMn <sub>0.2</sub> Fe <sub>0.2</sub> Co <sub>0.2</sub> Ni <sub>0.2</sub> Ti <sub>0.2</sub> O <sub>2</sub>                                                                                     | 1.5-4.2 V              | 180 mAh g <sup>-1</sup>   | 93.1% after 100 cycles (0.1 C)                                | Solid-state     | [1]  |
| O3-NaNi <sub>0.12</sub> Cu <sub>0.12</sub> Mg <sub>0.12</sub> Fe <sub>0.15</sub> Co <sub>0.15</sub> Mn <sub>0.1</sub> Ti <sub>0.1</sub> Sn <sub>0.1</sub> Sb <sub>0.04</sub> O <sub>2</sub>       | 2.0-3.9 V              | 110 mAh g <sup>-1</sup>   | 79% after 200 cycles (1 C),<br>83% after 500 cycles (3 C)     | Solid-state     | [2]  |
| O3-Na <sub>0.89</sub> Li <sub>0.05</sub> Cu <sub>0.11</sub> Ni <sub>0.11</sub> Fe <sub>0.3</sub> Mn <sub>0.43</sub> O <sub>1.97</sub> F <sub>0.03</sub>                                           | 1.5-4.0 V              | 138.6 mAh g <sup>-1</sup> | 80% after 300 cycles (1 C)                                    | Solid-state     | [3]  |
| O3-Na <sub>0.93</sub> Li <sub>0.12</sub> Ni <sub>0.25</sub> Fe <sub>0.15</sub> Mn <sub>0.48</sub> O <sub>2</sub>                                                                                  | 2.0-4.2 V              | 130.1 mAh g <sup>-1</sup> | 82.8% after 200 cycles<br>(1600 mA g <sup>-1</sup> )          | Solid-state     | [4]  |
| O3-NaLi <sub>1/9</sub> Ni <sub>2/9</sub> Fe <sub>2/9</sub> Mn <sub>4/9</sub> B <sub>1/50</sub> O <sub>2</sub>                                                                                     | 2.0-4.3 V              | 160.5 mAh g <sup>-1</sup> | 82.8% after 200 cycles<br>(250 mA g <sup>-1</sup> /1C)        | Solid-state     | [5]  |
| O3-NaFe <sub>0.2</sub> Co <sub>0.2</sub> Ni <sub>0.2</sub> Ti <sub>0.2</sub> Sn <sub>0.1</sub> Li <sub>0.1</sub> O <sub>2</sub>                                                                   | 2.0-4.1 V              | 112.7 mAh g <sup>-1</sup> | 72% after 100 cycles (0.1 C)<br>67% after 200 cycles (0.5 C)  | Solid-state     | [6]  |
| O3-NaNi <sub>0.1</sub> Mn <sub>0.15</sub> Co <sub>0.2</sub> Cu <sub>0.1</sub> Fe <sub>0.1</sub> Li <sub>0.1</sub> Ti <sub>0.15</sub> Sn <sub>0.1</sub> O <sub>2</sub>                             | 2.0-4.1 V              | 115 mAh g <sup>-1</sup>   | 82.7% after 1000 cycles<br>(160 mA g <sup>-1</sup> )          | Solid-state     | [7]  |
| P2-Na <sub>2/3</sub> Li <sub>1/6</sub> Fe <sub>1/6</sub> Co <sub>1/6</sub> Ni <sub>1/6</sub> Mn <sub>1/3</sub> O <sub>2</sub>                                                                     | 2.0-4.5 V              | 171.2 mAh g <sup>-1</sup> | 89.3% after 90 cycles (1C)<br>63.7% after 300 cycles (5 C)    | Solid-state     | [8]  |
| P2/O3- Na <sub>0.85</sub> Li <sub>0.05</sub> Ni <sub>0.25</sub> Cu <sub>0.025</sub> Mg <sub>0.025</sub> Fe <sub>0.05</sub> Al <sub>0.05</sub> Mn <sub>0.5</sub> Ti <sub>0.05</sub> O <sub>2</sub> | 2.0-4.2 V              | 122 mAh g <sup>-1</sup>   | 88% after 300 cycles (2C),<br>90% after 1000 cycles (10 C)    | Solid-state     | [9]  |
| O3-NaCu <sub>0.1</sub> Ni <sub>0.3</sub> Fe <sub>0.2</sub> Mn <sub>0.2</sub> Ti <sub>0.2</sub> O <sub>2</sub>                                                                                     | 2.0-3.9 V              | 130 mAh g <sup>-1</sup>   | 87% after 100 cycles (0.1C)<br>71% after 500 cycles (0.5C)    | Solid-state     | [10] |
| Na <sub>3-3x</sub> Al <sub>x</sub> PO <sub>4</sub> coating O3-NaNi <sub>0.4</sub> Fe <sub>0.2</sub> Mn <sub>0.4</sub> O <sub>2</sub>                                                              | 2.0-4.0 V<br>2.0-4.2 V | 147.6 mAh g <sup>-1</sup> | 80% after 200 cycles (1 C)                                    | Coprecipitation | [11] |
| O3-NaLi <sub>0.05</sub> Mn <sub>0.50</sub> Ni <sub>0.30</sub> Cu <sub>0.10</sub> Mg <sub>0.05</sub> O <sub>2</sub>                                                                                | 2.0-4.0 V              | 172 mAh g <sup>-1</sup>   | 63.1% after 1000 cycles (0.5C)<br>81.6% after 400 cycles (1C) | Coprecipitation | [12] |

|                                                                                                                              |           |                           |                                                             |             |           |
|------------------------------------------------------------------------------------------------------------------------------|-----------|---------------------------|-------------------------------------------------------------|-------------|-----------|
| $\text{NaMgPO}_4@ \text{NaNi}_{0.4}\text{Cu}_{0.1}\text{Mn}_{0.4}\text{Ti}_{0.1}\text{O}_2\text{-X}$                         | 2.4-4.3 V | 160 mAh g <sup>-1</sup>   | 65% after 100 cycles (0.25 C)                               | Solid-state | [13]      |
| $\text{O3-NaNi}_{0.25}\text{Mg}_{0.05}\text{Cu}_{0.1}\text{Fe}_{0.2}\text{Mn}_{0.2}\text{Ti}_{0.1}\text{Sn}_{0.1}\text{O}_2$ | 2.0-4.0 V | 130.8 mAh g <sup>-1</sup> | 75% after 500 cycles (1 C)                                  | Solid-state | [14]      |
| $\text{Na}_{0.95}\text{Li}_{0.07}\text{Sn}_{0.01}\text{Ni}_{0.22}\text{Fe}_{0.2}\text{Mn}_{0.5}\text{O}_2$                   | 2.0-4.0 V | 108.5 mAh g <sup>-1</sup> | 84% after 500 cycles (1 C)<br>84.7% after 2000 cycles (5 C) | Solid-state | This work |

- [1] K. Walczak, A. Plewa, C. Ghica, W. Zając, A. Tenczek-Zając, M. Zając, J. Toboła, J. Molenda, *Energy Storage Mater.*, **2022**, 47, 500.
- [2] C. Zhao, F. Ding, Y. Lu, L. Chen, Y. S. Hu, *Angew. Chem. Int. Ed.*, **2020**, 59, 264.
- [3] F. Ding, H. Wang, Q. Zhang, L. Zheng, H. Guo, P. Yu, N. Zhang, Q. Guo, F. Xie, R. Dang, X. Rong, Y. Lu, R. Xiao, L. Chen, Y. S. Hu, *J. Am. Chem. Soc.*, **2023**, 145, 13592.
- [4] X. G. Yuan, Y. J. Guo, L. Gan, X. A. Yang, W. H. He, X. S. Zhang, Y. X. Yin, S. Xin, H. R. Yao, Z. Huang, Y. G. Guo, *Adv. Funct. Mater.*, **2022**, 32, 2111466.
- [5] Y. J. Guo, P. F. Wang, Y. B. Niu, X. D. Zhang, Q. Li, X. Yu, M. Fan, W. P. Chen, Y. Yu, X. Liu, Q. Meng, S. Xin, Y. X. Yin, Y. G. Guo, *Nat. Commun.*, **2021**, 12, 5267.
- [6] K. Tian, H. He, X. Li, D. Wang, Z. Wang, R. Zheng, H. Sun, Y. Liu, Q. Wang, *J. Mater. Chem. A*, **2022**, 10, 14943.
- [7] X.-Y. Du, Y. Meng, H. Yuan, D. Xiao, *Energy Storage Mater.*, **2023**, 56, 132.
- [8] L. Yao, P. Zou, C. Wang, J. Jiang, L. Ma, S. Tan, K. A. Beyer, F. Xu, E. Hu, H. L. Xin, *Adv. Energy Mater.*, **2022**, 12.
- [9] J. Mu, T. Cai, W. Dong, C. Zhou, Z. Han, F. Huang, *Chem. Eng. J.*, **2023**, 471.
- [10] C.-C. Lin, H.-Y. Liu, J.-W. Kang, C.-C. Yang, C.-H. Li, H.-Y. T. Chen, S.-C. Huang, C.-S. Ni, Y.-C. Chuang, B.-H. Chen, C.-K. Chang, H.-Y. Chen, *Energy Storage Mater.*, **2022**, 51, 159.
- [11] H. Wang, F. Ding, Y. Wang, Z. Han, R. Dang, H. Yu, Y. Yang, Z. Chen, Y. Li, F. Xie, S. Zhang, H. Zhang, D. Song, X. Rong, L. Zhang, J. Xu, W. Yin, Y. Lu, R. Xiao, D. Su, L. Chen, Y.-S. Hu, *ACS Energy Lett.*, **2023**, 8, 1434.
- [12] J. Deng, W. B. Luo, X. Lu, Q. Yao, Z. Wang, H. K. Liu, H. Zhou, S. X. Dou, *Adv. Energy Mater.*, **2017**, 8, 1701610.
- [13] W. Xu, R. Dang, L. Zhou, Y. Yang, T. Lin, Q. Guo, F. Xie, Z. Hu, F. Ding, Y. Liu, Y. Liu, H. Mao, J. Hong, Z. Zuo, X. Wang, R. Yang, X. Jin, X. Hou, Y. Lu, X. Rong, N. Xu, Y. S. Hu, *Adv. Mater.*, **2023**, 35, e2301314.
- [14] F. Ding, C. Zhao, D. Xiao, X. Rong, H. Wang, Y. Li, Y. Yang, Y. Lu, Y. S. Hu, *J. Am. Chem. Soc.*, **2022**, 144, 8286.
